# Supplementary material
Source: Royal Society of Chemistry journal article supplement (doi:10.1039/d5fb00945f)
Supplement: d5fb00945f1.xlsx [file d5fb00945f1.xlsx]

## Sheet: Technofunctionality
Beverage	pH	Density (g/cm3)	Turbidity (NTU)	Apparent viscosity (80.7 mPa.s)	Seperation rate (%/min)	Particel size (nm)	PDI	Faoming Capacity (%)	Faoming Stability (%)
Water 0%	6.71	0.99847	0.16	1.1	0.0014	0	0	0	0
Water 0%	6.6	0.99846	0.19	0.932	0.0014	0	0	0	0
Water 0%	6.6	0.99847	0.12	1.19	0.0043	0	0	0	0
Water D 2.5%	8.13	1.00602	26.1	1.14	0.0842	285.5	0.618	117.021	36.3636
Water D 2.5%	8.15	1.00612	25.9	1.28	0.0859	291.6	0.548	119.149	37.5
Water D 2.5%	8.16	1.00614	25.1	1.39	0.0896	316.3	0.59	123.913	36.8421
Water D 5%	8.25	1.01374	42.7	1.66	0.1445	300.8	0.641	130.435	38.3333
Water D 5%	8.29	1.01381	42.7	1.54	0.1441	329.7	0.685	128.261	35.5932
Water D 5%	8.2	1.01382	42.8	1.51	0.1404	288.7	0.612	128.261	37.2881
Water D 10%	8.29	1.02943	58.2	2.76	0.1998	424.4	0.587	124.444	26.7857
Water D 10%	8.23	1.02951	59.2	2.46	0.2079	415.6	0.552	119.565	27.2727
Water D 10%	8.19	1.02951	58.2	2.47	0.2037	409.5	0.562	121.739	30.3571
Water N 2.5%	7.45	1.00636	52.4	1.36	0.054	267	0.521	130.435	20
Water N 2.5%	7.46	1.00647	52.7	1.41	0.0629	250.9	0.855	136.364	20
Water N 2.5%	7.45	1.00648	52.4	1.3	0.0623	248.8	0.532	135.556	19.6721
Water N 5%	7.44	1.01421	96.3	1.77	0.1112	333.4	0.498	129.787	22.9508
Water N 5%	7.46	1.01436	97.8	1.91	0.1153	349.9	0.591	127.66	23.3333
Water N 5%	7.44	1.01438	96.7	1.74	0.1109	332.1	0.57	128.261	25.4237
Water N 10%	7.44	1.0303	184	3.24	0.1696	570.6	0.466	119.565	32.7273
Water N 10%	7.45	1.03045	184	3.23	0.1751	561.3	0.591	123.404	32.7586
Water N 10%	7.45	1.03054	185	3.41	0.1634	555.6	0.618	134.783	33.871
Apple Juice 0%	3.5	1.04483	4.21	1.27	0.0439	2594	1	23.4043	90.9091
Apple Juice 0%	3.51	1.04485	4.27	1.23	0.046	2582	1	23.913	81.8182
Apple Juice 0%	3.52	1.04484	4.3	1.18	0.0434	2505	1	23.913	81.8182
Apple Juice D 2.5%	4.34	1.05151	648	1.9	5.725	5621	1	127.66	35
Apple Juice D 2.5%	4.19	1.05176	623	1.88	4.802	3241	1	123.913	33.3333
Apple Juice D 2.5%	4.26	1.05175	604	1.89	5.264	4959	0.551	122.917	35.5932
Apple Juice D 5%	4.75	1.05849	364	3.22	6.251	2487	0.134	128.261	37.2881
Apple Juice D 5%	4.72	1.05872	368	2.33	5.874	2110	0.289	130.435	35
Apple Juice D 5%	4.76	1.05869	350	2.5	6.135	3083	0.234	133.333	38.3333
Apple Juice D 10%	5.54	1.07326	473	4.35	5.45	6984	1	131.111	45.7627
Apple Juice D 10%	5.51	1.07159	460	3.91	5.493	6359	1	135.556	44.2623
Apple Juice D 10%	5.43	1.0734	467	3.94	5.254	6185	0.504	134.783	41.9355
Apple Juice N 2.5%	4.13	1.05206	679	2.09	5.678	9487	1	122.917	40.678
Apple Juice N 2.5%	4.13	1.05205	677	2.06	5.63	7403	1	125.532	42.3729
Apple Juice N 2.5%	4.11	1.05189	655	1.98	6.138	7259	1	112.245	30.9091
Apple Juice N 5%	4.49	1.05925	562	3.17	6.159	11670	1	124.444	37.5
Apple Juice N 5%	4.5	1.05947	546	2.62	6.203	11250	1	125.532	32.2034
Apple Juice N 5%	4.49	1.05962	538	2.85	6.163	10620	1	118.75	26.3158
Apple Juice N 10%	4.97	1.07431	909	5.5	1.785	886.1	0.771	119.565	20
Apple Juice N 10%	5	1.07442	982	5.3	1.141	798.2	1	120	23.3333
Apple Juice N 10%	4.97	1.07426	979	5.5	0.7098	817.7	0.773	128.261	20.339
7UP 0%	3.31	1.01748	0.13	1.31	0.0186	686.9	0.594	0	0
7UP 0%	3.28	1.01751	0.35	1.24	0.027	1122	0.339	0	0
7UP 0%	3.3	1.01752	0.25	1.2	0.0185	942.7	0.406	0	0
7UP D 2.5%	4.98	1.02478	1764	1.57	2.637	3392	1	122.222	38.1818
7UP D 2.5%	5.09	1.02489	1784	1.56	2.692	3012	1	117.021	40
7UP D 2.5%	5.02	1.02491	1758	1.65	3.182	3657	1	114.894	37.037
7UP D 5%	5.67	1.03236	604	1.98	0.5246	874.6	0.238	114.894	35.1852
7UP D 5%	5.71	1.0325	617	1.93	0.4552	1031	0.184	113.043	34.6154
7UP D 5%	5.67	1.03264	632	1.66	0.4756	924.2	0.247	112.766	35.8491
7UP D 10%	6.56	1.04691	842	3.1	0.1909	350.7	0.652	143.478	46.9697
7UP D 10%	6.55	1.04726	740	2.76	0.2071	338.9	0.767	144.444	43.0769
7UP D 10%	6.59	1.04785	729	2.57	0.1743	323.6	0.741	140	46.0317
7UP N 2.5%	4.65	1.02479	2000	1.77	2.688	2458	1	126.087	31.0345
7UP N 2.5%	4.65	1.02502	2000	1.79	2.792	5003	1	121.277	28.0702
7UP N 2.5%	4.65	1.02501	2000	1.84	2.568	4470	1	126.667	29.8246
7UP N 5%	5.08	1.0321	786	2.28	0.1289	266.3	0.544	122.222	25.4545
7UP N 5%	5.06	1.03268	785	2.23	0.1322	245.5	0.486	124.444	21.4286
7UP N 5%	5.08	1.03262	850	2.28	0.1249	247.6	0.475	126.667	22.807
7UP N 10%	5.57	1.04814	205	3.77	0.1885	391.3	0.653	122.917	33.8983
7UP N 10%	5.55	1.0484	159	4.29	0.1992	399.2	0.656	122.222	34.5455
7UP N 10%	5.56	1.04794	131	3.88	0.1974	428.8	0.712	126.087	34.4828
Free 7UP 0%	3.31	0.99972	0.55	1.04	0.0274	1035	0.552	0	0
Free 7UP 0%	3.28	0.99969	0.5	1.02	0.0292	1146	0.323	0	0
Free 7UP 0%	3.3	0.99966	0.1	1.07	0.0224	925.2	0.534	0	0
Free 7UP D 2.5%	4.97	1.00714	983	1.41	3.328	4321	1	119.149	37.5
Free 7UP D 2.5%	4.94	1.00714	920	1.41	3.347	4493	1	121.277	33.3333
Free 7UP D 2.5%	4.93	1.0072	878	1.35	3.244	3130	1	126.087	39.6552
Free 7UP D 5%	5.63	1.01484	992	1.65	1.888	1599	0.765	119.565	34.5455
Free 7UP D 5%	5.63	1.01499	981	1.76	1.865	1527	0.798	121.739	39.2857
Free 7UP D 5%	5.62	1.01499	979	1.74	1.706	1586	0.848	123.913	35.0877
Free 7UP D 10%	6.48	1.02926	609	2.73	0.201	328.4	0.588	137.778	41.9355
Free 7UP D 10%	6.51	1.03087	532	2.38	0.2109	297.8	0.637	121.739	35.7143
Free 7UP D 10%	6.44	1.0307	553	2.52	0.2108	330.2	0.72	122.222	38.1818
Free 7UP N 2.5%	4.65	1.0072	2000	1.69	3.332	3436	1	121.739	19.6429
Free 7UP N 2.5%	4.65	1.00731	2000	1.68	3.291	2184	1	123.913	17.5439
Free 7UP N 2.5%	4.65	1.00738	2000	1.55	3.063	2383	0.781	121.739	16.0714
Free 7UP N 5%	5.08	1.01524	252	1.68	0.2158	283.2	0.545	118.75	17.5439
Free 7UP N 5%	5.08	1.01536	272	1.89	0.1833	247.9	0.535	114.583	20
Free 7UP N 5%	5.07	1.01528	278	1.88	0.2268	300.1	0.537	126.667	19.2982
Free 7UP N 10%	5.6	1.03117	153	3.41	0.1807	331.1	0.665	123.913	33.3333
Free 7UP N 10%	5.6	1.0314	201	3.36	0.2061	412.8	0.678	113.043	38.4615
Free 7UP N 10%	5.61	1.0317	215	3.45	0.1937	337.1	0.662	123.913	33.3333
Ice Tea 0%	3.11	1.01769	23.2	1.11	0.039	222.2	0.244	25.5319	50
Ice Tea 0%	3.09	1.01774	24	0.961	0.0272	171.3	0.273	26.087	41.6667
Ice Tea 0%	3.1	1.01772	23.8	1.21	0.0403	167.2	0.372	21.7391	50
Ice Tea D 2.5%	4.71	1.02499	976	1.68	4.136	3642	0.6	117.021	36.3636
Ice Tea D 2.5%	4.72	1.025	983	1.45	3.9	3848	1	120	38.8889
Ice Tea D 2.5%	4.71	1.02487	981	1.5	4.429	3139	0.136	114.894	35.1852
Ice Tea D 5%	5.46	1.03263	961	1.76	2.507	3560	0.824	122.222	29.0909
Ice Tea D 5%	5.42	1.0325	965	2.01	2.836	3114	1	114.894	31.4815
Ice Tea D 5%	5.44	1.0326	934	2.01	2.939	4189	1	117.778	30.1887
Ice Tea D 10%	6.69	1.04787	81.4	3.13	0.2007	419.3	0.71	121.739	33.9286
Ice Tea D 10%	6.69	1.04792	85.1	3.02	0.1772	348.6	0.73	121.739	37.5
Ice Tea D 10%	6.65	1.04784	79.6	3.11	0.2045	330.8	0.703	123.913	33.3333
Ice Tea N 2.5%	4.53	1.0072	1039	1.85	5.228	2253	0.173	125	26.6667
Ice Tea N 2.5%	4.52	1.00731	943	1.66	5.146	2021	0.184	126.667	29.8246
Ice Tea N 2.5%	4.53	1.00738	1037	1.69	5.098	3006	0.092	123.404	32.7586
Ice Tea N 5%	5	1.01524	794	2.25	1.032	1552	0.661	125.532	18.6441
Ice Tea N 5%	4.99	1.01536	779	2.23	1.054	1916	1	127.66	20
Ice Tea N 5%	4.99	1.01528	770	2.28	0.8676	1739	1	132.609	19.6721
Ice Tea N 10%	5.59	1.03117	191	4.01	0.1929	337.6	0.545	130.435	38.3333
Ice Tea N 10%	5.57	1.0314	184	4.39	0.2075	345.9	0.545	130.435	40
Ice Tea N 10%	5.53	1.0317	183	4.23	0.2005	339.4	0.544	132.609	39.3443
Black Tea 0%	4.87	0.9995	26.6	1.17	0.0876	316	0.754	26.6667	58.3333
Black Tea 0%	4.88	0.99949	26.9	1.05	0.0719	332.3	0.622	31.1111	64.2857
Black Tea 0%	4.9	0.99946	28.9	1.08	0.0746	278.4	0.66	26.087	66.6667
Black Tea D 2.5%	7.55	1.00706	780	1.26	0.2287	153.2	0.131	126.667	38.5965
Black Tea D 2.5%	7.55	1.00711	784	1.36	0.2636	143	0.154	128.889	41.3793
Black Tea D 2.5%	7.57	1.00708	803	1.38	0.2707	139.2	0.129	133.333	41.6667
Black Tea D 5%	7.68	1.01473	749	1.66	0.3459	184.5	0.157	127.66	38.3333
Black Tea D 5%	7.73	1.01464	739	1.5	0.3489	193.7	0.132	132.609	39.3443
Black Tea D 5%	7.75	1.01386	725	1.55	0.3597	193.6	0.174	133.333	40
Black Tea D 10%	7.77	1.03016	713	2.31	0.8858	2326	0.121	117.021	36.3636
Black Tea D 10%	7.8	1.03034	687	2.34	0.8178	2418	0.15	121.739	35.7143
Black Tea D 10%	7.79	1.03036	699	2.26	1.003	2267	0.141	125	35
Black Tea N 2.5%	6.81	1.00726	1657	1.39	1.32	203.5	0.156	132.609	16.3934
Black Tea N 2.5%	6.84	1.00738	1636	1.28	1.325	190.9	0.13	129.787	18.0328
Black Tea N 2.5%	6.83	1.00735	1631	1.42	1.275	197.4	0.152	130.435	20
Black Tea N 5%	7.21	1.01518	755	1.89	5.305	468.4	0.233	120	29.6296
Black Tea N 5%	7.2	1.01518	756	1.86	4.792	675.7	0.268	121.277	33.3333
Black Tea N 5%	7.2	1.01517	786	1.64	5.287	675.9	0.268	126.667	29.8246
Black Tea N 10%	7.35	1.03058	1175	3.56	3.363	1690	0.477	117.391	29.6296
Black Tea N 10%	7.33	1.03119	1139	3.11	4.021	2057	0.34	121.739	32.1429
Black Tea N 10%	7.29	1.03107	1140	3.58	3.218	1681	0.72	117.021	30.9091
Non Alcoholic Beer 0%	4.32	1.01559	5.12	1.51	0.035	447.8	0.546	122.222	43.6364
Non Alcoholic Beer 0%	4.32	1.01559	4.87	1.42	0.0306	518.4	0.578	121.739	37.5
Non Alcoholic Beer 0%	4.32	1.01558	5.15	1.45	0.0347	428.5	0.526	121.277	38.5965
Non Alcoholic Beer D 2.5%	6.02	1.02253	756	1.71	1.053	2450	0.117	126.087	32.7586
Non Alcoholic Beer D 2.5%	6.01	1.02283	774	1.8	1.019	2179	0.266	124.444	35.7143
Non Alcoholic Beer D 2.5%	5.99	1.02275	769	1.81	1.024	2787	0.111	121.739	37.5
Non Alcoholic Beer D 5%	6.66	1.03016	284	1.88	0.1529	379	0.595	119.565	21.8182
Non Alcoholic Beer D 5%	6.65	1.03064	239	2.23	0.1626	420.7	0.595	117.391	27.7778
Non Alcoholic Beer D 5%	6.61	1.03085	252	2.07	0.1478	340	0.523	115.217	30.1887
Non Alcoholic Beer D 10%	7.27	1.045	89.3	3.1	0.19	516.5	0.644	129.787	42.623
Non Alcoholic Beer D 10%	7.26	1.04614	150	2.92	0.1802	686.2	0.437	133.333	40
Non Alcoholic Beer D 10%	7.28	1.04605	97	3.55	0.1979	640.6	0.434	136.957	41.2698
Non Alcoholic Beer N 2.5%	5.27	1.023	87.4	1.85	0.1231	351.3	0.745	128.889	12.069
Non Alcoholic Beer N 2.5%	5.26	1.02315	88.5	1.87	0.1261	304.9	0.651	128.889	12.069
Non Alcoholic Beer N 2.5%	5.25	1.02316	90.8	1.96	0.1245	352.7	0.747	121.277	10.5263
Non Alcoholic Beer N 5%	5.64	1.0309	90.8	2.44	0.1715	302.8	0.658	114.894	5.55556
Non Alcoholic Beer N 5%	5.61	1.03096	93.5	2.16	0.1625	346.9	0.674	120	5.55556
Non Alcoholic Beer N 5%	5.62	1.03097	94.6	2.31	0.1581	414.8	0.455	119.565	5.45455
Non Alcoholic Beer N 10%	6.08	1.04626	165	4.95	0.2075	1175	0.424	123.913	22.807
Non Alcoholic Beer N 10%	6.08	1.04626	163	4.44	0.2114	844.7	0.455	126.087	25.8621
Non Alcoholic Beer N 10%	6.07	1.04677	162	5.07	0.2061	899.3	0.45	127.66	26.6667

## Sheet: Tribology
Water			Water Dark			Water Neutral			Apple Juice Control			Apple Juice Dark			Apple Juice Neutral			Ice Tea Control			Ice Tea Dark			Ice Tea Neutral			Becks Blue Control			Becks Blue Dark			Becks Blue Neutral			7UP			7UP Dark			7UP Neutral			Free 7UP			Free 7UP Dark
Sliding Speed (m/s)	Friction factor μ in 1		Sliding Speed (m/s)	Friction factor μ in 1		Sliding Speed (m/s)	Friction factor μ in 1		Sliding Speed (m/s)	Friction factor μ in 1		Sliding Speed (m/s)	Friction factor μ in 1		Sliding Speed (m/s)	Friction factor μ in 1		Sliding Speed (m/s)	Friction factor μ in 1		Sliding Speed (m/s)	Friction factor μ in 1		Sliding Speed (m/s)	Friction factor μ in 1		Sliding Speed (m/s)	Friction factor μ in 1		Sliding Speed (m/s)	Friction factor μ in 1		Sliding Speed (m/s)	Friction factor μ in 1		Sliding Speed (m/s)	Friction factor μ in 1		Sliding Speed (m/s)	Friction factor μ in 1		Sliding Speed (m/s)	Friction factor μ in 1		Sliding Speed (m/s)	Friction factor μ in 1		Sliding Speed (m/s)	Friction factor μ in 1
	Average	SDV		Average	SDV		Average	SDV	Average	Average	SDV		Average	SDV		Average	SDV		Average	SDV	Average	Average	SDV	Average	Average	SDV	Average	Average	SDV	Average	Average	SDV	Average	Average	SDV		Average	SDV		Average	SDV		Average	SDV		Average	SDV		Average
1.1761e-08	0.000648537	6.44397e-05	1.17177e-08	-0.0031584	0.00261817	1.17458e-08	-0.00240017	0.00281817	1.18087e-08	-0.0500362	0.0197037	1.18083e-08	-0.0010802	0.00264258	1.16552e-08	-0.00163372	0.00219137	1.16713e-08	-0.0118482	0.00933011	1.16962e-08	-0.00520908	0.00317756	1.17023e-08	-0.00190117	0.00187937	1.17918e-08	-0.0619253	0.00348614	1.18117e-08	-0.000402885	0.00127372	1.1706e-08	0.00142115	0.000725632	1.17813e-08	0.000830867	0.000254508	1.18447e-08	-0.00123972	0.00219615	1.18417e-08	-0.00207371	0.000976367	1.16747e-08	0.000656065	0.000224706	1.18015e-08	-0.000953233
1.46978e-08	0.0013519	0.000114211	1.48498e-08	-0.00250999	0.00257559	1.47465e-08	-0.00180333	0.00278425	1.48153e-08	-0.0488818	0.0195306	1.4776e-08	-0.000432864	0.00264605	1.47313e-08	-0.000938493	0.00219817	1.48093e-08	-0.0111144	0.00899881	1.48017e-08	-0.00440027	0.00316255	1.48167e-08	-0.00119545	0.00186996	1.48272e-08	-0.060481	0.0033399	1.4766e-08	0.000220407	0.00139745	1.47593e-08	0.00210745	0.000760095	1.47993e-08	0.00157678	0.000290595	1.48063e-08	-0.000572758	0.00214763	1.4888e-08	-0.00149466	0.00095531	1.4823e-08	0.00143321	0.000434665	1.47987e-08	-0.000324068
1.86245e-08	0.00209745	0.000115466	1.85735e-08	-0.00186527	0.00258598	1.86495e-08	-0.00119326	0.00275575	1.87648e-08	-0.0479517	0.0194253	1.86358e-08	0.000220457	0.00263695	1.87068e-08	-0.000243975	0.00218987	1.86352e-08	-0.0104202	0.00880219	1.87437e-08	-0.00357106	0.00325407	1.86288e-08	-0.00050054	0.00188013	1.8645e-08	-0.0594438	0.00325191	1.86855e-08	0.000842438	0.00148946	1.87343e-08	0.0027931	0.000797477	1.86418e-08	0.00226982	0.000300862	1.87087e-08	4.48923e-05	0.00212705	1.86127e-08	-0.000999157	0.00103399	1.86057e-08	0.00220798	0.000611072	1.87153e-08	0.000285802
2.34952e-08	0.00292967	0.000136284	2.35202e-08	-0.00117928	0.00259442	2.35048e-08	-0.000520707	0.00271988	2.35752e-08	-0.0470028	0.0193403	2.3616e-08	0.000948693	0.002597	2.35647e-08	0.000527286	0.00218669	2.35143e-08	-0.00969977	0.00865158	2.35397e-08	-0.00279925	0.00324268	2.35852e-08	0.000274168	0.00189447	2.35072e-08	-0.0584843	0.00313925	2.35603e-08	0.00153241	0.00155172	2.3528e-08	0.00355572	0.000873293	2.34885e-08	0.0030055	0.00032749	2.34957e-08	0.000741413	0.00211117	2.3631e-08	-0.000322552	0.00103589	2.35355e-08	0.00303403	0.000730864	2.34645e-08	0.000970012
2.97847e-08	0.00385992	0.000159235	2.96245e-08	-0.000412453	0.0025912	2.96598e-08	0.000227488	0.00270828	2.96683e-08	-0.0459863	0.0193031	2.97225e-08	0.0018018	0.00253886	2.96537e-08	0.00139502	0.00221058	2.97398e-08	-0.00886265	0.0085644	2.96452e-08	-0.00187928	0.00321615	2.97235e-08	0.00116335	0.00194488	2.9613e-08	-0.0574323	0.00307125	2.97027e-08	0.0023238	0.00159158	2.95228e-08	0.00441285	0.000878743	2.96913e-08	0.00382043	0.000365726	2.95153e-08	0.00154705	0.00212508	2.9851e-08	0.000446616	0.00104925	2.95925e-08	0.00397897	0.000863654	2.95135e-08	0.00177669
3.72403e-08	0.00491252	0.000150232	3.73648e-08	0.00048085	0.00262622	3.72298e-08	0.00112578	0.00266187	3.7403e-08	-0.0448081	0.0192347	3.73303e-08	0.00278842	0.00248832	3.73825e-08	0.00239096	0.00231128	3.74045e-08	-0.00788312	0.00846276	3.7274e-08	-0.000802853	0.00317296	3.73493e-08	0.0021707	0.00203934	3.74328e-08	-0.0563028	0.00291507	3.72918e-08	0.0032818	0.00160266	3.73618e-08	0.00542452	0.000884561	3.73412e-08	0.00473465	0.000409378	3.72955e-08	0.0024741	0.00210131	3.73585e-08	0.00135015	0.00106493	3.73638e-08	0.00505023	0.000971615	3.73123e-08	0.00271677
4.70855e-08	0.00611657	0.000190157	4.71193e-08	0.00152172	0.00269677	4.7048e-08	0.00219602	0.00262341	4.71243e-08	-0.0434327	0.0192051	4.71308e-08	0.00399588	0.00246156	4.70835e-08	0.00359439	0.00235718	4.71753e-08	-0.00670297	0.00841781	4.70117e-08	0.000490715	0.00315286	4.70933e-08	0.00339468	0.00214354	4.70135e-08	-0.054976	0.00276616	4.70272e-08	0.00438728	0.00157918	4.7021e-08	0.0066312	0.000921791	4.70445e-08	0.00584788	0.000497557	4.71408e-08	0.00353798	0.00213087	4.71295e-08	0.00241125	0.0011216	4.71155e-08	0.00631303	0.00108687	4.71352e-08	0.00381675
5.93298e-08	0.00754815	0.000219791	5.92788e-08	0.0027315	0.00272769	5.92582e-08	0.00343725	0.00257445	5.93623e-08	-0.0417687	0.0191464	5.92637e-08	0.0054737	0.00239737	5.93423e-08	0.00500071	0.00242174	5.92985e-08	-0.00526607	0.00836634	5.9223e-08	0.00202983	0.0030917	5.93797e-08	0.00483932	0.00222902	5.94345e-08	-0.0533972	0.00262527	5.92075e-08	0.00574582	0.00157812	5.92347e-08	0.00810267	0.000939509	5.92528e-08	0.00717943	0.000605764	5.92917e-08	0.00478812	0.00215115	5.93523e-08	0.00367547	0.001176	5.93672e-08	0.00778785	0.00119617	5.92688e-08	0.00513458
7.48208e-08	0.0093422	0.000316808	7.47797e-08	0.00412424	0.00273222	7.48123e-08	0.00497255	0.00244016	7.47947e-08	-0.0396851	0.0193272	7.4764e-08	0.00728787	0.00237984	7.45698e-08	0.0067072	0.0025137	7.46698e-08	-0.00354353	0.00835149	7.47543e-08	0.00383645	0.0030293	7.48002e-08	0.00659157	0.00227008	7.47158e-08	-0.0515082	0.00259267	7.4721e-08	0.00738785	0.00150905	7.47125e-08	0.00978855	0.000886791	7.46785e-08	0.00878947	0.000773018	7.47742e-08	0.00634135	0.0021877	7.48323e-08	0.00520042	0.00121292	7.47253e-08	0.00955283	0.00126193	7.4683e-08	0.00676107
9.41305e-08	0.0115627	0.000533442	9.40427e-08	0.00582883	0.00274483	9.42237e-08	0.00684268	0.00226797	9.4212e-08	-0.0372918	0.0192279	9.41325e-08	0.00948267	0.00244074	9.43243e-08	0.00860345	0.00256435	9.42353e-08	-0.00144737	0.00825563	9.41355e-08	0.00598635	0.00304222	9.42607e-08	0.00870603	0.002272	9.4258e-08	-0.0492873	0.00262138	9.42732e-08	0.00944027	0.00144561	9.41242e-08	0.011823	0.000832836	9.42558e-08	0.0107966	0.00107515	9.411e-08	0.00825952	0.0022473	9.42113e-08	0.0070813	0.00120208	9.41418e-08	0.0116795	0.00113357	9.41297e-08	0.00873108
1.18683e-07	0.0142703	0.000532638	1.18677e-07	0.00800063	0.00275571	1.18783e-07	0.00912288	0.00206185	1.18648e-07	-0.0345049	0.019111	1.188e-07	0.0121202	0.00254831	1.18648e-07	0.0108926	0.00260245	1.18742e-07	0.00112508	0.0080464	1.1882e-07	0.00844257	0.0030877	1.1867e-07	0.011252	0.00217691	1.187e-07	-0.0465962	0.00277937	1.18675e-07	0.0119405	0.00150711	1.1872e-07	0.0141363	0.00081567	1.18645e-07	0.0132563	0.0015926	1.18768e-07	0.0107457	0.00229437	1.18862e-07	0.00942862	0.000983472	1.18725e-07	0.014194	0.000870587	1.18697e-07	0.0112007
1.49643e-07	0.0174877	0.00053529	1.49492e-07	0.0108265	0.00289581	1.49462e-07	0.0119607	0.00190198	1.49575e-07	-0.0312427	0.0190792	1.49667e-07	0.015188	0.00269855	1.49457e-07	0.0138173	0.00260126	1.49552e-07	0.00419863	0.00762365	1.49373e-07	0.0114106	0.00319456	1.49527e-07	0.0143337	0.00214502	1.49467e-07	-0.0434047	0.00285113	1.49448e-07	0.0147477	0.00174258	1.49427e-07	0.0169057	0.00102766	1.49498e-07	0.0161472	0.00207923	1.4965e-07	0.0137793	0.00227052	1.49653e-07	0.0123297	0.000756638	1.4964e-07	0.0171815	0.000744611	1.49707e-07	0.014152
1.88475e-07	0.0211115	0.000675013	1.88585e-07	0.0142851	0.00320885	1.88615e-07	0.0152668	0.00185149	1.88538e-07	-0.0272473	0.019194	1.88482e-07	0.0188102	0.00264603	1.8855e-07	0.017564	0.00264717	1.88477e-07	0.00798239	0.00726999	1.88523e-07	0.0152102	0.00316598	1.88442e-07	0.01805	0.00242326	1.8843e-07	-0.0394495	0.00261956	1.8863e-07	0.0177727	0.00195735	1.88592e-07	0.0201618	0.00133245	1.88517e-07	0.0194867	0.00238951	1.88533e-07	0.0171598	0.00222122	1.88613e-07	0.0157367	0.000760665	1.88393e-07	0.0209127	0.00094573	1.8851e-07	0.0175088
2.3745e-07	0.025586	0.000851012	2.37667e-07	0.01808	0.00347269	2.37598e-07	0.019153	0.00176244	2.37605e-07	-0.0222347	0.0192809	2.37397e-07	0.0233908	0.00235968	2.375e-07	0.0220643	0.00275323	2.3764e-07	0.0125901	0.00741679	2.37485e-07	0.0199325	0.00289303	2.3763e-07	0.0225	0.00275961	2.37493e-07	-0.0345453	0.00244032	2.3749e-07	0.0214278	0.00192248	2.37472e-07	0.0240498	0.00165853	2.3734e-07	0.0235957	0.00269739	2.37677e-07	0.0209983	0.00235991	2.37587e-07	0.019601	0.00101802	2.37578e-07	0.0255568	0.00120026	2.37572e-07	0.0215385
2.99413e-07	0.0315318	0.00124272	2.9934e-07	0.0226917	0.00361985	2.99337e-07	0.0239588	0.0016734	2.99233e-07	-0.0161728	0.0190787	2.99247e-07	0.0291808	0.0026386	2.99265e-07	0.0270652	0.00283513	2.99293e-07	0.0181856	0.00743638	2.99295e-07	0.0252708	0.00286928	2.99417e-07	0.0278088	0.00271151	2.99378e-07	-0.0286627	0.0027174	2.99247e-07	0.0261995	0.00214399	2.99428e-07	0.0282218	0.00232301	2.99442e-07	0.028932	0.00360863	2.99305e-07	0.0258157	0.00257481	2.99337e-07	0.02408	0.000880004	2.99413e-07	0.031013	0.000921488	2.99325e-07	0.0264577
3.7735e-07	0.0381987	0.00151093	3.7729e-07	0.0287798	0.00407532	3.77263e-07	0.0298045	0.00195434	3.77135e-07	-0.00908737	0.019114	3.77307e-07	0.0357623	0.00286228	3.77302e-07	0.0334455	0.00294734	3.77152e-07	0.024796	0.00699938	3.77253e-07	0.0317425	0.00293494	3.77358e-07	0.0342045	0.00294372	3.77203e-07	-0.0215735	0.00257786	3.77182e-07	0.0311275	0.00287255	3.7709e-07	0.0327512	0.00356649	3.77235e-07	0.034992	0.00439782	3.76985e-07	0.0316218	0.00274638	3.77362e-07	0.0294168	0.00127379	3.77208e-07	0.037617	0.00120896	3.76982e-07	0.0322413
4.75343e-07	0.0465962	0.0018615	4.75178e-07	0.0354447	0.00451961	4.75355e-07	0.0366542	0.00220894	4.7535e-07	-0.000109083	0.019046	4.7511e-07	0.0441718	0.00291932	4.75597e-07	0.0406667	0.00311685	4.75322e-07	0.0328118	0.00746932	4.75302e-07	0.039701	0.00270926	4.75323e-07	0.0417108	0.00326591	4.75212e-07	-0.0128815	0.0026923	4.75277e-07	0.0369088	0.00327233	4.75505e-07	0.0375527	0.00512173	4.75178e-07	0.042577	0.0053651	4.75343e-07	0.037868	0.00320988	4.7535e-07	0.035037	0.00181012	4.75222e-07	0.0457623	0.00125298	4.75257e-07	0.0387618
5.99023e-07	0.0565318	0.00238421	5.98983e-07	0.0440562	0.00507249	5.98918e-07	0.0448618	0.0030242	5.99047e-07	0.0104768	0.0192881	5.99133e-07	0.053939	0.00323173	5.98845e-07	0.049099	0.00338753	5.99068e-07	0.0423623	0.0074679	5.98993e-07	0.0488435	0.00243629	5.99212e-07	0.0504425	0.00359681	5.98978e-07	-0.00236705	0.00262508	5.9891e-07	0.0430098	0.00450005	5.98997e-07	0.0422073	0.00727464	5.99158e-07	0.051526	0.00656558	5.99277e-07	0.0452868	0.00374568	5.98873e-07	0.0413497	0.00287128	5.9918e-07	0.0555508	0.00167604	5.99248e-07	0.0462395
7.5496e-07	0.0690052	0.00303048	7.54695e-07	0.0539735	0.0056301	7.54877e-07	0.054419	0.00422196	7.54688e-07	0.023543	0.0193363	7.54987e-07	0.06608	0.00393135	7.54595e-07	0.0583322	0.00385917	7.54742e-07	0.0536097	0.00803627	7.5497e-07	0.0592517	0.00211655	7.54637e-07	0.0601962	0.00441045	7.5506e-07	0.0105592	0.00290636	7.5486e-07	0.0498895	0.00599591	7.54643e-07	0.0466482	0.00952283	7.54972e-07	0.0625853	0.00831465	7.5481e-07	0.0533248	0.0045763	7.54787e-07	0.047745	0.00374788	7.54882e-07	0.0673467	0.0019343	7.54802e-07	0.0545372
9.51407e-07	0.0839972	0.00375687	9.51023e-07	0.065687	0.00627602	9.51182e-07	0.0653513	0.00571821	9.50965e-07	0.0396908	0.0196453	9.51302e-07	0.0807258	0.00494696	9.51285e-07	0.0685203	0.00471105	9.51423e-07	0.0666153	0.00872134	9.51147e-07	0.0711485	0.00194425	9.51082e-07	0.0707453	0.00622033	9.51165e-07	0.0260697	0.0032561	9.51243e-07	0.056595	0.00787913	9.5111e-07	0.0509628	0.0117127	9.5119e-07	0.0758218	0.0102302	9.51187e-07	0.0615105	0.00561766	9.5142e-07	0.0541988	0.0049523	9.50988e-07	0.0815593	0.00234604	9.51188e-07	0.0631193
1.19862e-06	0.101958	0.0046914	1.19867e-06	0.0793923	0.00700581	1.19865e-06	0.0772398	0.00732226	1.19863e-06	0.059379	0.020256	1.19855e-06	0.098094	0.00678002	1.19877e-06	0.0792975	0.006495	1.19858e-06	0.081462	0.00914435	1.1987e-06	0.0840055	0.00312738	1.19882e-06	0.0811638	0.00880908	1.19862e-06	0.0452423	0.00369842	1.19872e-06	0.0631345	0.0101555	1.19858e-06	0.0552645	0.0138242	1.19855e-06	0.0916237	0.0123532	1.19877e-06	0.0696238	0.00680038	1.19865e-06	0.0606912	0.0064328	1.19873e-06	0.0986658	0.0029945	1.1988e-06	0.071727
1.51063e-06	0.123727	0.00570201	1.51035e-06	0.0950163	0.00761406	1.51062e-06	0.0885223	0.00956205	1.51038e-06	0.0839458	0.0214761	1.51073e-06	0.118215	0.00955428	1.51042e-06	0.0903083	0.0092447	1.51053e-06	0.097917	0.00914834	1.51045e-06	0.0972368	0.00628839	1.5105e-06	0.0911012	0.0121557	1.51067e-06	0.0686445	0.0045389	1.51062e-06	0.0694308	0.0123645	1.5103e-06	0.0597027	0.0157569	1.51047e-06	0.110656	0.0147866	1.5103e-06	0.0770848	0.00786141	1.51055e-06	0.067141	0.00795175	1.51022e-06	0.119058	0.00368169	1.51032e-06	0.0798262
1.9035e-06	0.14997	0.00699179	1.90355e-06	0.112635	0.00815821	1.90352e-06	0.0967605	0.0160217	1.90355e-06	0.113633	0.0228302	1.90362e-06	0.140042	0.0140373	1.90375e-06	0.101009	0.0124708	1.9033e-06	0.11534	0.00887005	1.90335e-06	0.109559	0.0105156	1.90375e-06	0.100152	0.0152576	1.9036e-06	0.0976712	0.00625196	1.90345e-06	0.0756593	0.0145285	1.90353e-06	0.0642723	0.0174585	1.90345e-06	0.133553	0.0173183	1.90348e-06	0.083867	0.00865298	1.9035e-06	0.0736217	0.00938169	1.90328e-06	0.143017	0.00477321	1.90343e-06	0.0871413
2.39853e-06	0.181907	0.0080099	2.3985e-06	0.131663	0.00880514	2.3985e-06	0.104633	0.0223728	2.39863e-06	0.149883	0.0246527	2.39845e-06	0.161385	0.0199324	2.39863e-06	0.111188	0.0154725	2.3989e-06	0.13308	0.00933765	2.39878e-06	0.120557	0.0152897	2.39862e-06	0.108238	0.0178165	2.39875e-06	0.133653	0.00907546	2.3987e-06	0.0817187	0.0163786	2.39867e-06	0.0692372	0.0191821	2.3987e-06	0.160573	0.0194055	2.399e-06	0.0896072	0.00923779	2.39863e-06	0.0799683	0.0104869	2.3985e-06	0.171002	0.00636164	2.39892e-06	0.0933117
3.02253e-06	0.221195	0.00920024	3.02283e-06	0.150995	0.00943567	3.02257e-06	0.111685	0.0259675	3.02272e-06	0.194248	0.0260836	3.02283e-06	0.179312	0.0266247	3.02265e-06	0.120795	0.0178654	3.02277e-06	0.150357	0.0112956	3.02263e-06	0.12977	0.0193375	3.0231e-06	0.115716	0.019386	3.02267e-06	0.17811	0.0123836	3.02282e-06	0.0877298	0.0179789	3.02233e-06	0.0745397	0.0209402	3.02285e-06	0.191653	0.0210022	3.02273e-06	0.0946845	0.00967568	3.02277e-06	0.0863323	0.0115422	3.0226e-06	0.202958	0.00879921	3.0226e-06	0.0986717
3.8091e-06	0.26842	0.0113715	3.80947e-06	0.168675	0.0105051	3.8092e-06	0.115241	0.0271072	3.80917e-06	0.247992	0.026608	3.80888e-06	0.191513	0.0323246	3.80905e-06	0.129935	0.0194266	3.80902e-06	0.166645	0.0139132	3.80918e-06	0.137545	0.0219128	3.80892e-06	0.123272	0.020646	3.80922e-06	0.231945	0.0146019	3.80888e-06	0.0939208	0.0194401	3.8094e-06	0.0803253	0.022835	3.8091e-06	0.226847	0.0220304	3.8089e-06	0.099682	0.0100767	3.80882e-06	0.0929592	0.0126192	3.8089e-06	0.23871	0.0123887	3.80907e-06	0.10374
4.80038e-06	0.322997	0.0145847	4.79995e-06	0.18184	0.0138551	4.80035e-06	0.116528	0.0263696	4.79975e-06	0.31199	0.0257736	4.80023e-06	0.199683	0.0353086	4.80022e-06	0.138825	0.0206677	4.80048e-06	0.181828	0.0163696	4.8e-06	0.144762	0.0231709	4.79983e-06	0.131205	0.0220022	4.80013e-06	0.294105	0.0160831	4.79997e-06	0.100322	0.0209527	4.79985e-06	0.08657	0.0249242	4.7995e-06	0.265198	0.0226158	4.80013e-06	0.105136	0.010747	4.80027e-06	0.100006	0.0136645	4.79988e-06	0.277818	0.0162972	4.79992e-06	0.109184
6.04875e-06	0.383167	0.0178076	6.04867e-06	0.191315	0.0177658	6.04882e-06	0.121527	0.0274254	6.0489e-06	0.385555	0.0252331	6.04872e-06	0.20785	0.0367445	6.04875e-06	0.147667	0.0215759	6.04887e-06	0.195915	0.0182408	6.04872e-06	0.152218	0.0242421	6.04842e-06	0.139538	0.0233604	6.04883e-06	0.360387	0.0187737	6.0489e-06	0.106837	0.0224844	6.04925e-06	0.0932652	0.0270295	6.0486e-06	0.30639	0.0224264	6.04912e-06	0.110661	0.0113311	6.04867e-06	0.107324	0.0148409	6.0488e-06	0.318735	0.0200888	6.0491e-06	0.114734
7.62265e-06	0.445747	0.0215797	7.62237e-06	0.193543	0.020689	7.62237e-06	0.126447	0.0286029	7.62252e-06	0.461877	0.0276741	7.62282e-06	0.216685	0.0381439	7.62222e-06	0.156682	0.0224397	7.6224e-06	0.209068	0.0197283	7.62253e-06	0.160157	0.0254068	7.62232e-06	0.148303	0.0247931	7.6224e-06	0.425072	0.0227166	7.62247e-06	0.113728	0.02407	7.62283e-06	0.100392	0.0291943	7.62257e-06	0.348988	0.0206653	7.62202e-06	0.116548	0.0121653	7.62218e-06	0.114965	0.0159072	7.62218e-06	0.359993	0.0233999	7.62232e-06	0.120588
9.60565e-06	0.502527	0.0273766	9.6055e-06	0.197	0.0199347	9.60542e-06	0.132262	0.0299042	9.6056e-06	0.52794	0.0377122	9.60555e-06	0.226072	0.0396684	9.60515e-06	0.16594	0.0230724	9.60527e-06	0.221462	0.0211851	9.60558e-06	0.1688	0.0268244	9.6058e-06	0.157472	0.0262472	9.60527e-06	0.480657	0.0272386	9.6053e-06	0.120731	0.0255066	9.60555e-06	0.107959	0.0314308	9.60553e-06	0.391418	0.0186656	9.60505e-06	0.122688	0.0130844	9.60518e-06	0.123007	0.0170675	9.60525e-06	0.40026	0.0262828	9.60527e-06	0.126602
1.21043e-05	0.547672	0.0340514	1.21043e-05	0.19974	0.0201382	1.21043e-05	0.138725	0.0314798	1.21042e-05	0.571703	0.0571653	1.21043e-05	0.23576	0.0413037	1.21043e-05	0.175418	0.0233869	1.21047e-05	0.232998	0.0230189	1.21047e-05	0.178085	0.0283964	1.21042e-05	0.167162	0.0273425	1.21042e-05	0.526017	0.0396665	1.21047e-05	0.128035	0.0268658	1.21043e-05	0.115914	0.0337975	1.2104e-05	0.431587	0.0197733	1.21047e-05	0.129112	0.0141526	1.2104e-05	0.131335	0.0181685	1.21043e-05	0.438157	0.0294472	1.21047e-05	0.132913
1.52532e-05	0.582472	0.0403432	1.52533e-05	0.201738	0.0193387	1.52533e-05	0.145346	0.0330902	1.52532e-05	0.595022	0.0701218	1.52535e-05	0.245517	0.0429077	1.5254e-05	0.184995	0.023235	1.52532e-05	0.244303	0.0252772	1.52535e-05	0.18794	0.0298268	1.52535e-05	0.177248	0.0282515	1.52532e-05	0.549635	0.0569691	1.52533e-05	0.135477	0.0282189	1.5253e-05	0.12415	0.0360658	1.52532e-05	0.46699	0.0279374	1.52538e-05	0.135733	0.0152989	1.52538e-05	0.139972	0.0192094	1.52532e-05	0.473137	0.0332096	1.52537e-05	0.139402
1.92215e-05	0.60903	0.0451735	1.92213e-05	0.203247	0.0183083	1.92218e-05	0.151685	0.0346132	1.92217e-05	0.604108	0.0728476	1.92212e-05	0.2549	0.0441833	1.92213e-05	0.194792	0.0226188	1.92222e-05	0.255542	0.0280919	1.92215e-05	0.198233	0.0311903	1.92218e-05	0.187503	0.0287334	1.92217e-05	0.558498	0.0561782	1.9222e-05	0.14335	0.0294784	1.92218e-05	0.132784	0.0381598	1.92213e-05	0.494988	0.0382611	1.92215e-05	0.142513	0.0165304	1.92215e-05	0.14884	0.0202644	1.9222e-05	0.503255	0.0371748	1.92217e-05	0.146078
2.4223e-05	0.630782	0.0490384	2.42228e-05	0.204242	0.0172407	2.42227e-05	0.15757	0.0357966	2.42218e-05	0.607822	0.0723581	2.42222e-05	0.263358	0.04518	2.42218e-05	0.204903	0.0217521	2.42225e-05	0.266838	0.0313177	2.42225e-05	0.208723	0.0323156	2.42227e-05	0.19822	0.0288278	2.4222e-05	0.57339	0.0539289	2.42222e-05	0.15112	0.030369	2.42225e-05	0.141818	0.0398996	2.42227e-05	0.514225	0.0450968	2.42223e-05	0.149763	0.0177321	2.42227e-05	0.158328	0.0211329	2.42225e-05	0.527792	0.0410874	2.42223e-05	0.153155
3.05233e-05	0.650182	0.0522109	3.05237e-05	0.20519	0.0161999	3.0524e-05	0.162657	0.0359001	3.05238e-05	0.606597	0.0720414	3.05238e-05	0.271293	0.0452349	3.05238e-05	0.215895	0.021034	3.05238e-05	0.278345	0.0343209	3.0524e-05	0.219248	0.0333408	3.0524e-05	0.209437	0.0294755	3.05235e-05	0.590053	0.0527961	3.05242e-05	0.158308	0.0308058	3.05242e-05	0.151073	0.0410988	3.05238e-05	0.52706	0.0462331	3.05237e-05	0.157847	0.0185666	3.0524e-05	0.167547	0.0214693	3.05243e-05	0.547927	0.0438809	3.05238e-05	0.160802
3.8465e-05	0.668068	0.0550948	3.84647e-05	0.205628	0.01476	3.84643e-05	0.166733	0.0348344	3.84647e-05	0.598965	0.0698777	3.84645e-05	0.278102	0.0435084	3.84645e-05	0.227858	0.0206532	3.84652e-05	0.290015	0.0346856	3.84642e-05	0.230023	0.0355319	3.84643e-05	0.221252	0.0307107	3.84638e-05	0.602408	0.048917	3.84645e-05	0.164713	0.0308169	3.84648e-05	0.159672	0.0407919	3.84647e-05	0.53605	0.043898	3.84652e-05	0.166188	0.0187094	3.84648e-05	0.176292	0.0203095	3.84653e-05	0.566235	0.0435715	3.8465e-05	0.168237
4.8471e-05	0.681938	0.0564765	4.84717e-05	0.204692	0.0129632	4.84715e-05	0.1705	0.0346005	4.84715e-05	0.588907	0.067067	4.84707e-05	0.283588	0.0402455	4.84718e-05	0.238615	0.0191129	4.84712e-05	0.301592	0.0334136	4.84715e-05	0.241985	0.0373433	4.84717e-05	0.232663	0.0317965	4.84717e-05	0.610807	0.0444439	4.8472e-05	0.170448	0.0305757	4.84717e-05	0.167285	0.0395729	4.84713e-05	0.539305	0.0429839	4.84715e-05	0.173327	0.0183006	4.84718e-05	0.185008	0.0187408	4.84725e-05	0.581362	0.0411952	4.84717e-05	0.174832
6.10815e-05	0.692895	0.0532283	6.10812e-05	0.202073	0.0117854	6.10825e-05	0.17459	0.0348064	6.10817e-05	0.574313	0.0682384	6.10817e-05	0.286828	0.0366267	6.10815e-05	0.24825	0.017261	6.10815e-05	0.315938	0.0327029	6.10822e-05	0.254773	0.037502	6.1082e-05	0.242548	0.0315748	6.10818e-05	0.619403	0.0446377	6.10808e-05	0.175433	0.0297517	6.10815e-05	0.17376	0.0374357	6.10823e-05	0.537553	0.0433864	6.10813e-05	0.179323	0.0167617	6.10813e-05	0.192388	0.0168099	6.10818e-05	0.591002	0.0421434	6.10812e-05	0.180797
7.69725e-05	0.702392	0.0529845	7.6973e-05	0.199308	0.0111347	7.69725e-05	0.177988	0.0324789	7.69722e-05	0.548977	0.0687823	7.69722e-05	0.288353	0.0313965	7.69725e-05	0.25712	0.0183999	7.69728e-05	0.330855	0.0284929	7.69713e-05	0.263673	0.0365366	7.69723e-05	0.249602	0.0315727	7.69718e-05	0.621105	0.0389148	7.69725e-05	0.178765	0.0277684	7.69722e-05	0.1768	0.034375	7.6972e-05	0.535567	0.0442201	7.69722e-05	0.18616	0.0151617	7.69723e-05	0.197592	0.0137041	7.69723e-05	0.599617	0.044792	7.69723e-05	0.18687
9.69965e-05	0.700002	0.0510707	9.69983e-05	0.194743	0.0126314	9.6998e-05	0.179692	0.0312396	9.69963e-05	0.52239	0.0656566	9.69962e-05	0.286698	0.0270982	9.69975e-05	0.261572	0.017348	9.6997e-05	0.343968	0.022226	9.6997e-05	0.269635	0.0332066	9.69968e-05	0.254308	0.0280852	9.69975e-05	0.618518	0.0358444	9.69968e-05	0.179415	0.0253492	9.69967e-05	0.175392	0.031435	9.69972e-05	0.527513	0.048332	9.69973e-05	0.189747	0.0142755	9.69978e-05	0.202482	0.0106025	9.69973e-05	0.602407	0.0466287	9.69968e-05	0.19031
0.00012223	0.700493	0.0545435	0.00012223	0.191362	0.0148458	0.00012223	0.177542	0.0258885	0.00012223	0.492245	0.0637696	0.000122232	0.28179	0.0250666	0.000122232	0.260315	0.0169808	0.00012223	0.350365	0.0151381	0.00012223	0.267152	0.0302521	0.000122232	0.25558	0.0227243	0.000122232	0.60477	0.0357116	0.00012223	0.177192	0.0232713	0.00012223	0.168278	0.0278779	0.00012223	0.525443	0.0541073	0.00012223	0.195152	0.0157143	0.000122232	0.207068	0.0117646	0.00012223	0.602973	0.0473442	0.00012223	0.194567
0.00015403	0.69502	0.0592135	0.000154037	0.18545	0.0159804	0.000154032	0.17382	0.0232465	0.00015403	0.471218	0.0618945	0.000154027	0.275133	0.0246527	0.000154035	0.251687	0.00885933	0.000154032	0.35462	0.0174641	0.000154032	0.259578	0.0288074	0.00015403	0.253848	0.0143731	0.00015403	0.582427	0.0321726	0.000154028	0.172385	0.0223454	0.000154032	0.159433	0.0260568	0.00015403	0.523778	0.0656927	0.000154032	0.197738	0.0187088	0.000154033	0.210032	0.0128857	0.00015403	0.600678	0.0464466	0.000154032	0.196753
0.000194102	0.685883	0.0676859	0.00019411	0.176493	0.0169457	0.000194107	0.166933	0.0232258	0.000194098	0.444725	0.0623156	0.000194098	0.26049	0.0186545	0.000194105	0.245193	0.00610282	0.000194102	0.358955	0.0247219	0.0001941	0.251485	0.0300297	0.0001941	0.248867	0.0136209	0.000194103	0.543818	0.0214721	0.0001941	0.164452	0.0179257	0.0001941	0.155002	0.0240166	0.0001941	0.51003	0.0676856	0.000194108	0.197778	0.0234824	0.000194107	0.20995	0.0116322	0.000194102	0.580045	0.0436453	0.000194105	0.194225
0.0002446	0.675113	0.0677927	0.00024459	0.1615	0.0175165	0.000244598	0.159285	0.0196627	0.000244602	0.413802	0.0660797	0.000244603	0.240652	0.0138622	0.000244595	0.238233	0.00680886	0.000244597	0.372388	0.0271807	0.000244598	0.247515	0.0290416	0.000244597	0.239938	0.0132188	0.0002446	0.505078	0.011437	0.000244605	0.157792	0.0125756	0.000244603	0.150912	0.019585	0.0002446	0.490803	0.0630903	0.000244597	0.19138	0.0219085	0.000244595	0.203623	0.0123969	0.000244598	0.558092	0.045158	0.000244598	0.185928
0.000308232	0.655542	0.0678243	0.00030825	0.146227	0.0171243	0.00030824	0.148197	0.014761	0.000308225	0.394657	0.0661531	0.000308223	0.231793	0.0187413	0.000308232	0.22587	0.00360666	0.000308228	0.374572	0.0296011	0.000308227	0.236073	0.0238983	0.000308233	0.230398	0.0127222	0.000308228	0.47313	0.0141887	0.000308232	0.15661	0.0133862	0.000308227	0.145038	0.0173674	0.000308233	0.487997	0.0669574	0.000308247	0.182472	0.0176185	0.00030824	0.193023	0.0129787	0.000308227	0.55264	0.0417646	0.00030824	0.178168
0.00038841	0.655122	0.0793157	0.00038843	0.13317	0.0183875	0.000388417	0.137283	0.0161702	0.000388418	0.381485	0.0759718	0.000388403	0.224825	0.0141796	0.000388442	0.220498	0.0094895	0.000388428	0.362702	0.025709	0.000388435	0.227065	0.0225874	0.000388422	0.228733	0.0181881	0.00038842	0.434673	0.0182956	0.000388382	0.153743	0.0111912	0.000388427	0.146638	0.0166301	0.000388408	0.495228	0.0617578	0.000388412	0.175082	0.0212538	0.000388422	0.188577	0.0104491	0.000388422	0.548078	0.0325307	0.000388413	0.170375
0.00048946	0.659667	0.0741774	0.000489522	0.12202	0.0163999	0.00048948	0.132817	0.0175023	0.00048946	0.357815	0.0762557	0.000489452	0.219337	0.0158194	0.000489495	0.212403	0.00519825	0.000489455	0.359452	0.0227125	0.000489477	0.224602	0.0199781	0.000489467	0.22065	0.0162964	0.000489457	0.398102	0.0173085	0.000489437	0.153867	0.0125504	0.000489467	0.144472	0.0113446	0.000489453	0.499437	0.0476514	0.000489492	0.167018	0.0126179	0.000489495	0.18013	0.00961922	0.00048946	0.559973	0.038136	0.000489482	0.163555
0.000616802	0.711092	0.0621744	0.00061679	0.118864	0.0193581	0.000616788	0.128905	0.0219484	0.000616822	0.355267	0.0726256	0.000616817	0.219977	0.0139054	0.000616835	0.211627	0.0113358	0.000616813	0.363963	0.0285324	0.000616842	0.22137	0.0214731	0.000616808	0.21931	0.0117148	0.000616815	0.379582	0.0157627	0.000616785	0.156378	0.00998718	0.000616822	0.149472	0.0121177	0.0006168	0.527487	0.036416	0.000616777	0.162168	0.0121237	0.000616792	0.174343	0.00682863	0.000616808	0.580523	0.0414506	0.000616788	0.158275
0.000777273	0.739783	0.0289803	0.000777278	0.11586	0.0167926	0.000777275	0.126407	0.0200198	0.00077727	0.358233	0.0702408	0.000777273	0.234257	0.015677	0.000777268	0.21095	0.0104041	0.000777273	0.370858	0.0385537	0.000777272	0.216098	0.0196545	0.000777273	0.215025	0.0109005	0.00077727	0.392497	0.0132255	0.000777273	0.158818	0.00949267	0.000777273	0.14769	0.0138926	0.000777277	0.556338	0.0532563	0.000777275	0.161257	0.0119855	0.000777273	0.170042	0.00532374	0.000777272	0.613135	0.039884	0.000777273	0.157975
0.000979487	0.70125	0.0264307	0.000979478	0.10519	0.015729	0.000979483	0.119375	0.0137245	0.000979487	0.33739	0.0701056	0.000979488	0.225895	0.0074748	0.000979478	0.204757	0.0105102	0.00097948	0.347285	0.0212025	0.000979485	0.212738	0.0218859	0.000979483	0.210928	0.0109818	0.000979483	0.369693	0.0131045	0.000979488	0.153198	0.00957301	0.000979485	0.14429	0.0123992	0.000979487	0.531452	0.08925	0.000979482	0.156043	0.0155596	0.000979483	0.162	0.00573709	0.000979483	0.600143	0.0415239	0.000979483	0.152978
0.0012343	0.667115	0.0515101	0.0012343	0.1031	0.0108446	0.00123432	0.115753	0.0124945	0.0012343	0.31082	0.0742945	0.0012343	0.208665	0.00788727	0.0012343	0.19798	0.0106176	0.0012343	0.319438	0.0214571	0.0012343	0.210475	0.0217963	0.00123432	0.204918	0.00801969	0.0012343	0.350335	0.0114668	0.00123432	0.150558	0.00782016	0.0012343	0.143792	0.0113943	0.00123433	0.521893	0.10684	0.0012343	0.150203	0.0175177	0.0012343	0.160253	0.00849245	0.0012343	0.587607	0.030444	0.0012343	0.14738
0.0015554	0.691358	0.0281492	0.0015554	0.10392	0.0121827	0.0015554	0.117158	0.0174535	0.0015554	0.303003	0.0734616	0.0015554	0.204442	0.0102838	0.00155538	0.189208	0.0056816	0.0015554	0.31751	0.0347053	0.0015554	0.207667	0.0227243	0.0015554	0.202205	0.006826	0.0015554	0.335847	0.00615549	0.00155542	0.151913	0.00526179	0.0015554	0.139337	0.0101624	0.00155542	0.54521	0.0672654	0.0015554	0.145647	0.0152343	0.0015554	0.16137	0.0138551	0.0015554	0.601697	0.0307172	0.0015554	0.144375
0.00196007	0.671322	0.0314491	0.0019601	0.100806	0.0122542	0.00196008	0.116146	0.0173155	0.00196008	0.302245	0.0772344	0.00196007	0.200455	0.00911331	0.00196007	0.181983	0.00129322	0.00196005	0.300083	0.0133513	0.00196007	0.203632	0.0245419	0.00196007	0.196918	0.00963984	0.00196003	0.330088	0.0101812	0.00196007	0.14499	0.00590355	0.00196008	0.136878	0.0111108	0.00196007	0.522698	0.0467313	0.00196008	0.146032	0.0156171	0.00196008	0.162575	0.0139706	0.00196007	0.599917	0.0203688	0.00196008	0.144068
0.00247	0.726638	0.0477439	0.00247	0.101104	0.0112891	0.00247	0.115294	0.0214361	0.00247	0.276635	0.0738177	0.00247	0.194577	0.0180967	0.00247	0.177015	0.00596551	0.00247	0.280643	0.0246623	0.00247	0.199967	0.0214951	0.00247	0.189552	0.0141911	0.00247	0.327782	0.0118955	0.00247	0.146477	0.00686293	0.00247	0.133255	0.0105553	0.00247	0.555693	0.044254	0.00247	0.148937	0.0117772	0.00247	0.164345	0.0092165	0.00247	0.643328	0.0448648	0.00247	0.146395
0.00311257	0.709325	0.0471501	0.00311255	0.100589	0.0137435	0.00311257	0.104639	0.012707	0.00311252	0.25763	0.0763261	0.00311257	0.1967	0.0210956	0.00311257	0.170212	0.00673115	0.00311253	0.267348	0.0246603	0.00311255	0.195322	0.0186814	0.00311258	0.180985	0.01428	0.00311257	0.324768	0.0127179	0.00311258	0.137658	0.00626422	0.00311258	0.129543	0.00952155	0.00311253	0.514212	0.0689197	0.0031126	0.146137	0.0130402	0.00311258	0.149693	0.00856093	0.00311257	0.62979	0.0516778	0.00311258	0.142073
0.0039223	0.714582	0.0358688	0.0039223	0.0947957	0.0111278	0.0039223	0.10314	0.0117971	0.0039223	0.235983	0.0692675	0.0039223	0.18276	0.0116545	0.0039223	0.15644	0.00801436	0.0039223	0.261432	0.0175374	0.0039223	0.187733	0.0199106	0.0039223	0.170942	0.00758038	0.0039223	0.316063	0.0151796	0.0039223	0.132175	0.00588338	0.0039223	0.12573	0.00872988	0.0039223	0.515177	0.0555883	0.0039223	0.134222	0.0145262	0.0039223	0.133637	0.0057978	0.0039223	0.625497	0.0505647	0.0039223	0.131382
0.0049427	0.68643	0.0384167	0.0049427	0.0956995	0.0129285	0.0049427	0.103094	0.0153751	0.0049427	0.225537	0.0650584	0.0049427	0.16365	0.0132685	0.0049427	0.142458	0.00151915	0.0049427	0.247968	0.0147289	0.0049427	0.179283	0.0228838	0.0049427	0.163107	0.00802683	0.0049427	0.30666	0.0119782	0.0049427	0.12631	0.00438401	0.0049427	0.119038	0.00962602	0.0049427	0.51516	0.0341239	0.0049427	0.129353	0.0132843	0.0049427	0.13627	0.00715831	0.0049427	0.61917	0.0287545	0.0049427	0.127492
0.0062286	0.718345	0.0371961	0.0062286	0.0966087	0.0144008	0.0062286	0.094926	0.0115319	0.0062286	0.201277	0.0600543	0.0062286	0.161283	0.0193682	0.0062286	0.135528	0.00647343	0.0062286	0.230487	0.0184794	0.0062286	0.172717	0.0183124	0.0062286	0.152148	0.0126601	0.0062286	0.308702	0.0107155	0.0062286	0.120132	0.00521825	0.0062286	0.112862	0.00875066	0.0062286	0.513432	0.0808837	0.0062286	0.128077	0.0103922	0.0062286	0.126147	0.0076506	0.00622858	0.638753	0.0472759	0.0062286	0.124627
0.007849	0.696033	0.0350745	0.00784898	0.0911723	0.0126673	0.007849	0.093104	0.0122602	0.00784897	0.18534	0.0489893	0.007849	0.143077	0.0126176	0.007849	0.118557	0.00320834	0.007849	0.216737	0.0129546	0.007849	0.161475	0.021026	0.007849	0.14278	0.00592168	0.007849	0.292958	0.00640569	0.00784898	0.113468	0.0038572	0.007849	0.104686	0.00789012	0.007849	0.498493	0.0224996	0.007849	0.114586	0.0117605	0.00784898	0.115958	0.00644296	0.00784895	0.618775	0.0386597	0.007849	0.113292
0.0098909	0.722065	0.0182011	0.0098909	0.0906252	0.0135032	0.0098909	0.086554	0.0103205	0.0098909	0.16625	0.0357956	0.0098909	0.13611	0.0167382	0.0098909	0.111345	0.00589535	0.0098909	0.204765	0.0140697	0.0098909	0.153523	0.0161782	0.0098909	0.129783	0.00935192	0.00989093	0.28568	0.00850923	0.0098909	0.106202	0.00503105	0.0098909	0.0976843	0.00772463	0.00989092	0.486885	0.0899476	0.0098909	0.111025	0.00698939	0.0098909	0.104783	0.00712093	0.00989092	0.62788	0.0432135	0.0098909	0.108405
0.012464	0.692718	0.0369485	0.012464	0.0866498	0.0113825	0.012464	0.0834683	0.011833	0.012464	0.16	0.0258875	0.012464	0.1181	0.0150281	0.012464	0.0977158	0.00461046	0.012464	0.188958	0.0113504	0.012464	0.141227	0.0171346	0.012464	0.119247	0.0110706	0.012464	0.264525	0.00770426	0.012464	0.0973162	0.00371407	0.012464	0.0883432	0.00813902	0.012464	0.462103	0.0803244	0.012464	0.104226	0.00729393	0.012464	0.100343	0.00583653	0.012464	0.618043	0.0359861	0.012464	0.102136
0.015707	0.674778	0.0534456	0.015707	0.0820833	0.011752	0.015707	0.0774268	0.0108809	0.015707	0.154667	0.0270985	0.015707	0.103933	0.0135234	0.015707	0.0842488	0.00349094	0.015707	0.175282	0.0122332	0.015707	0.128802	0.0165179	0.015707	0.107072	0.00863457	0.0157068	0.240235	0.00700326	0.015707	0.0885327	0.00322384	0.015707	0.0792672	0.00779211	0.015707	0.424222	0.0664579	0.015707	0.0937633	0.00689657	0.015707	0.0895712	0.00534533	0.015707	0.592282	0.0299783	0.015707	0.092147
0.019793	0.642868	0.0463981	0.019793	0.0771765	0.0111646	0.019793	0.0696942	0.00888626	0.019793	0.142913	0.0229751	0.019793	0.0917443	0.0127815	0.019793	0.072735	0.00344419	0.019793	0.159712	0.0146772	0.019793	0.116813	0.0147738	0.019793	0.094757	0.00879626	0.019793	0.228537	0.00375779	0.019793	0.0791602	0.00316258	0.019793	0.0705962	0.00734248	0.0197928	0.373987	0.084943	0.019793	0.0846382	0.00600673	0.019793	0.0785137	0.00610486	0.019793	0.56439	0.0307686	0.019793	0.0829473
0.024942	0.539183	0.125285	0.024942	0.0708935	0.0104774	0.024942	0.0617587	0.00701142	0.024942	0.127613	0.0195935	0.024942	0.0806447	0.0114398	0.024942	0.0609673	0.00322654	0.024942	0.145807	0.017326	0.024942	0.104337	0.0133158	0.024942	0.0826655	0.00619128	0.024942	0.203408	0.00383042	0.024942	0.0702392	0.00306854	0.024942	0.0614478	0.00662235	0.024942	0.295742	0.0323355	0.024942	0.0735677	0.00588399	0.024942	0.0657967	0.00641569	0.024942	0.522855	0.0303985	0.024942	0.0720747
0.0314315	0.449748	0.155965	0.031431	0.0646652	0.00986665	0.031431	0.0542428	0.0065891	0.031431	0.114579	0.0137839	0.031431	0.0680872	0.0104506	0.031431	0.050433	0.00235266	0.031431	0.131022	0.017709	0.031431	0.091788	0.0121988	0.031431	0.0708265	0.00606386	0.031431	0.178618	0.00241885	0.031431	0.0611227	0.00312392	0.031431	0.0530107	0.00636459	0.0314307	0.25125	0.017347	0.031431	0.064742	0.00493457	0.031431	0.0571832	0.00591314	0.0314307	0.369287	0.0613521	0.031431	0.063506
0.0396078	0.39851	0.15858	0.039608	0.0572392	0.0088054	0.039608	0.0466493	0.00565342	0.039608	0.100332	0.00926637	0.039608	0.057088	0.00916516	0.039608	0.0410918	0.00188139	0.039608	0.118119	0.0173471	0.039608	0.0796085	0.0111499	0.039608	0.0595283	0.0050152	0.039608	0.153668	0.00233568	0.039608	0.0522662	0.00273434	0.039608	0.0450845	0.00616508	0.0396082	0.227655	0.00869214	0.039608	0.0556958	0.00501406	0.039608	0.0477488	0.0058274	0.0396075	0.300738	0.0124551	0.039608	0.0545288
0.0499117	0.364167	0.139132	0.049912	0.0501503	0.00768074	0.049912	0.0389595	0.00512086	0.049912	0.0858438	0.00507519	0.049912	0.0472992	0.00837961	0.049912	0.0332315	0.00172058	0.049912	0.103252	0.0147576	0.049912	0.0678557	0.0095585	0.049912	0.0492202	0.00482321	0.049912	0.129795	0.00195294	0.049912	0.0441727	0.00272473	0.049912	0.037826	0.00589631	0.049912	0.204193	0.0132653	0.049912	0.0474203	0.00410125	0.049912	0.0396773	0.00543497	0.0499118	0.282227	0.00692168	0.049912	0.0463992
0.062897	0.319143	0.117953	0.062897	0.043024	0.00681636	0.062897	0.03187	0.0041605	0.062897	0.0723342	0.0026936	0.062897	0.0388552	0.00762477	0.062897	0.0264008	0.00139857	0.062897	0.0883532	0.011976	0.062897	0.0568458	0.00819671	0.062897	0.0400313	0.00427268	0.062897	0.105923	0.00141626	0.062897	0.0365525	0.00261733	0.062897	0.0313187	0.00562854	0.062897	0.168425	0.00904793	0.062897	0.0396237	0.00378079	0.062897	0.0324142	0.00507753	0.062897	0.244498	0.00718694	0.062897	0.0386367
0.0792598	0.24989	0.0927047	0.0792598	0.0357752	0.0058381	0.07926	0.0347588	0.0209157	0.07926	0.0597908	0.00174261	0.07926	0.0316017	0.00687753	0.0792598	0.0207888	0.00114785	0.07926	0.0720277	0.00842927	0.07926	0.0469467	0.00706439	0.07926	0.0321598	0.00328612	0.07926	0.0832108	0.00149458	0.07926	0.0300385	0.00243568	0.07926	0.0256282	0.00528158	0.07926	0.135642	0.00844646	0.0792598	0.032395	0.0034366	0.07926	0.0261972	0.00436389	0.0792598	0.200818	0.00566379	0.0792597	0.0315775
0.0998792	0.187453	0.064589	0.099879	0.0293783	0.00493147	0.099879	0.0231212	0.00585389	0.099879	0.0488668	0.00163366	0.0998797	0.0259803	0.00649065	0.0998792	0.0164223	0.00102931	0.0998793	0.0570688	0.00521549	0.099879	0.0380325	0.00597878	0.0998797	0.0254923	0.0027463	0.099879	0.0639878	0.00165657	0.0998797	0.0242773	0.00223014	0.0998797	0.0209252	0.00498889	0.0998793	0.104413	0.0100039	0.099879	0.0264182	0.00312728	0.0998792	0.021146	0.0038545	0.0998792	0.16049	0.00458399	0.099879	0.0256473
0.125863	0.139288	0.0502953	0.12587	0.0236545	0.00386536	0.125867	0.0181352	0.00395157	0.12587	0.0392063	0.00213499	0.125863	0.021695	0.00624942	0.125863	0.0133423	0.000711663	0.125867	0.0443055	0.0029094	0.12587	0.0303438	0.00481518	0.125867	0.0199928	0.00225909	0.125867	0.048572	0.00158102	0.12586	0.0195697	0.0020543	0.125867	0.0173147	0.00458622	0.125863	0.078889	0.0106702	0.125867	0.0212052	0.00250281	0.12587	0.0169828	0.00310143	0.12587	0.124347	0.00395557	0.125863	0.020578
0.15861	0.0986837	0.037057	0.158617	0.019045	0.00320208	0.15861	0.0146333	0.00297711	0.158613	0.0312317	0.00202548	0.158607	0.0181732	0.00576388	0.158607	0.0109772	0.000624382	0.158617	0.0343678	0.00232832	0.15861	0.0238665	0.00367876	0.15861	0.0158507	0.00156209	0.158613	0.0361682	0.00169168	0.158613	0.0158427	0.00188789	0.158613	0.0144153	0.0041533	0.15861	0.059093	0.00872121	0.158607	0.0172655	0.00208681	0.15861	0.0139777	0.00261997	0.158613	0.0909087	0.00281359	0.158607	0.0166615
0.199868	0.0677532	0.0224642	0.19986	0.0155505	0.00242245	0.199863	0.0120659	0.002086	0.199867	0.024707	0.00208378	0.19987	0.0157677	0.0054855	0.199865	0.00977973	0.000481546	0.199875	0.0272058	0.00232592	0.199868	0.0187515	0.00292522	0.199868	0.0127162	0.001317	0.19987	0.0268463	0.0014938	0.199872	0.013206	0.00167898	0.199867	0.0125799	0.00356254	0.199863	0.043774	0.00607876	0.199867	0.0139865	0.00161792	0.199863	0.0116817	0.00186995	0.19987	0.0640602	0.00337154	0.19987	0.0135303
0.25186	0.0457748	0.0114459	0.251863	0.012882	0.00186904	0.251867	0.010517	0.00153664	0.25187	0.0196558	0.00187572	0.251863	0.0139643	0.00493407	0.251867	0.00910032	0.000350066	0.251867	0.0218845	0.00220808	0.251863	0.0150375	0.00228126	0.251867	0.0106907	0.001047	0.25186	0.0200373	0.00133975	0.25187	0.0113342	0.00132332	0.251867	0.0113963	0.00313949	0.25187	0.0329553	0.00450791	0.25186	0.0120327	0.00131401	0.251863	0.0104932	0.00146859	0.25186	0.0454638	0.00239159	0.25186	0.0115913
0.317383	0.0319195	0.00497972	0.31739	0.011089	0.00146481	0.317383	0.00966537	0.00135652	0.317393	0.0156653	0.00174079	0.317397	0.0126743	0.00469982	0.31738	0.00868453	0.000150537	0.317383	0.0176828	0.00171747	0.317387	0.0122688	0.0015527	0.317393	0.00933742	0.000842051	0.317387	0.0149833	0.00100989	0.317387	0.0101373	0.000982972	0.31739	0.0104135	0.0027559	0.317393	0.0250802	0.00324181	0.317383	0.0107475	0.00102536	0.317397	0.0096726	0.00108177	0.317387	0.0325388	0.00202266	0.317387	0.0103083
0.39996	0.0231263	0.00166983	0.39996	0.0104342	0.00150245	0.399967	0.00927108	0.00103587	0.39996	0.0130388	0.00143924	0.399963	0.0121412	0.00428853	0.399967	0.00902098	0.000148646	0.399967	0.0148138	0.00177807	0.399967	0.0109542	0.00131888	0.399963	0.00905542	0.000612384	0.399967	0.0121667	0.0009752	0.399967	0.00986048	0.00103569	0.399963	0.0104373	0.00236087	0.399957	0.0198308	0.0025566	0.399963	0.00977793	0.000760784	0.399963	0.00958592	0.000547785	0.399967	0.0240135	0.00159144	0.399963	0.00948287
0.504015	0.0183068	0.000714833	0.504025	0.0106637	0.00120864	0.504013	0.0096274	0.000988497	0.504008	0.0114734	0.00125508	0.50402	0.0122395	0.00370667	0.504012	0.00977897	0.000449219	0.504	0.0126752	0.00158519	0.504003	0.0102119	0.00105299	0.50402	0.00918782	0.000660764	0.50401	0.0103108	0.000711455	0.504018	0.0100341	0.000842855	0.504018	0.0108103	0.00183194	0.504003	0.0160292	0.00181696	0.504008	0.010032	0.00108287	0.504022	0.0100362	0.000849318	0.504012	0.0188647	0.00129108	0.504008	0.00973775
0.63514	0.0141182	0.00504364	0.63514	0.0112805	0.00677494	0.635137	0.0124294	0.00465824	0.635137	0.00910842	0.00243407	0.635143	0.00874869	0.00521762	0.635147	0.008833	0.00250376	0.635137	0.009785	0.00367383	0.635143	0.00732613	0.00500801	0.63514	0.00667327	0.00372195	0.63514	0.0104886	0.00366769	0.635143	0.00861445	0.00390459	0.635143	0.0101884	0.0020496	0.635137	0.0155092	0.00330828	0.635133	0.00987375	0.00341096	0.635143	0.00852477	0.00638716	0.63514	0.0115948	0.00397543	0.635133	0.00804321
0.800367	0.0124145	0.0010604	0.800367	0.0106525	0.00113245	0.80037	0.0102585	0.00108403	0.800367	0.00996035	0.00121	0.800367	0.0115503	0.0032038	0.80037	0.01081	0.000373627	0.80037	0.00996798	0.000954724	0.800367	0.0101117	0.00093463	0.800367	0.00973543	0.000777742	0.80037	0.00865932	0.000738368	0.80037	0.01016	0.000650316	0.800363	0.0115001	0.00162091	0.800367	0.0119257	0.00083574	0.800367	0.0106255	0.000411023	0.800375	0.0106462	0.000309732	0.80037	0.0124938	0.00104463	0.800367	0.0104439
1.0086	0.0120822	0.00104957	1.0086	0.0114245	0.00120189	1.0086	0.0115904	0.00109939	1.0086	0.00999977	0.000797588	1.0086	0.0132879	0.00293652	1.0086	0.012949	0.000579163	1.0086	0.0104811	0.00108773	1.0086	0.0111332	0.000406916	1.0086	0.0107191	0.00059155	1.0086	0.0092885	0.000928223	1.0086	0.011317	0.000603851	1.0086	0.01284	0.00101448	1.0086	0.0121717	0.0010483	1.0086	0.0119378	0.000514542	1.0086	0.012162	0.000641433	1.0086	0.0119668	0.000973581	1.0086	0.0118395
[truncated: 13 more columns]
